# Supplementary material for: SFTPA1 is a potential prognostic biomarker correlated with immune cell infiltration and response to immunotherapy in lung adenocarcinoma
Source: Cancer Immunol Immunother. 2021 Jun 28;71(2):399–415. doi: 10.1007/s00262-021-02995-4 (PMC8783894; doi:10.1007/s00262-021-02995-4)
Supplement: Supplementary file 5 — Supplementary file5 (XLSX 813 KB) [file 262_2021_2995_MOESM5_ESM.xlsx]

## Sheet: Sheet1
交集125	R
SFTPA2	0.983298
SFTPD	0.650376
AGER	0.643783
AGTR2	0.582443
DMBT1	0.551077
RXRG	0.549315
VIPR1	0.545149
SERPIND1	0.511698
DUOX1	0.509482
TMEM173	0.507392
IL33	0.493614
EDNRB	0.491924
CTSE	0.482337
SCTR	0.481136
PGC	0.473727
CAT	0.473312
CCL14	0.467117
CCL23	0.461851
GDF10	0.461197
CD1C	0.460056
TRIM22	0.45518
ADRB2	0.445185
TEK	0.444495
COLEC12	0.433023
FABP4	0.430838
SCGB3A1	0.430498
CD1E	0.429636
CTSG	0.428396
TNFSF13	0.423316
NPR1	0.422888
SLC40A1	0.421339
AGRP	0.406045
A2M	0.404613
CD1A	0.402099
NR3C2	0.396217
S1PR1	0.395615
SLC10A2	0.394059
FCGRT	0.393685
TGFBR2	0.39304
CSF3R	0.391703
CX3CR1	0.391286
CYSLTR1	0.389639
HLA-DPB1	0.38814
ANGPTL7	0.38676
CMA1	0.386752
TLR2	0.386627
CCL18	0.386542
FOS	0.3859
CCR6	0.385561
LTF	0.383458
HLA-DOA	0.38217
HLA-DMA	0.380645
SPINK5	0.37888
TLR3	0.37779
MARCO	0.376374
IL12B	0.375313
RETN	0.373244
TNFSF12	0.371798
CALCRL	0.368799
MASP1	0.366905
CD1B	0.361329
DES	0.360637
HLA-DPA1	0.358793
APOH	0.358567
ROBO2	0.358476
S100B	0.358087
IL6R	0.357879
PTK2B	0.354774
CD22	0.353701
RXFP1	0.353337
CD40LG	0.352789
SSTR1	0.352589
KL	0.350656
RBP2	0.350312
BTK	0.349782
CXCL2	0.348839
CD74	0.348477
GHR	0.347502
PCSK2	0.347166
HLA-DRB1	0.34363
RORB	0.343494
PTGDS	0.342503
OGN	0.342342
NR0B2	0.339443
ACVRL1	0.338876
PIK3R1	0.338769
HLA-DRA	0.338286
TGFBR3	0.338198
PRKCB	0.337827
CNTFR	0.336783
PTGER4	0.334412
PGR	0.334253
CCL13	0.331753
CCL22	0.330394
MR1	0.330191
NOD1	0.329917
CSPG5	0.328099
FGR	0.327901
CHIT1	0.32743
LGMN	0.326845
PLXNA2	0.326812
ANGPTL5	0.325817
CCL17	0.324913
C3	0.322552
IL1RL1	0.322374
PTH1R	0.321807
LEFTY2	0.32162
CCRL2	0.321005
CCR4	0.318653
UCN3	0.318463
TNFRSF10C	0.315805
SLPI	0.315751
TRIM5	0.31532
HTR3C	0.314917
HBEGF	0.314763
PTGFR	0.314364
AZU1	0.312689
CXCL14	0.309867
HLA-DMB	0.30949
CIITA	0.307132
S100Z	0.305979
HLA-DRB5	0.303659
BMP2	0.301057
SHC3	0.300786
PLA2G2A	0.300101
